# Supplementary material
Source: PubMed Central journal article supplement (PMC6958515)
Supplement: NIHMS1046129-supplement-Supplementary.pdf [file NIHMS1046129-supplement-Supplementary.pdf]

# Supplementary Material

## A coarse-grained approach for investigating the structure and dynamics of large nucleic acid species

*Sweta Vangnaveti<sup>1</sup>, Rebecca J. D'Esposito<sup>2</sup>, Jennifer L. Lippens<sup>3</sup>, Daniele Fabris<sup>2,4\*</sup>, Srivathsan*

*Ranganathan<sup>1\*</sup>*

1) The RNA Institute, University at Albany, 2016A Life Sciences Research Building, Albany, NY

2) Department of Chemistry, University at Albany, NY

3) Discovery Analytical Sciences, Amgen, Thousand Oaks, CA

4) Department of Biological Sciences, University at Albany, NY

\* Corresponding authors: Daniele Fabris: [fabris@albany.edu](mailto:fabris@albany.edu)  
Srivathsan Ranganathan: [svranganathan@albany.edu](mailto:svranganathan@albany.edu)

## TABLES

**Table 1S. Sequences of the oligonucleotides employed in the study. Species marked with † are single stranded (ss), whereas those marked with \* were combined with the respective complementary strand (not listed) to form a duplex construct of corresponding length.**

| Figure No. | Length                              | Sequence                                                           | Remarks                                                                                                             |
|------------|-------------------------------------|--------------------------------------------------------------------|---------------------------------------------------------------------------------------------------------------------|
| 2,2S       | 3mer <sup>†*</sup>                  | CCU                                                                | Used for Parameterization & Refinement (Structures are generated using Nucleic Acid Builder (NAB) package of Amber) |
| 2,2S       | 5mer <sup>†*</sup>                  | CCUAC                                                              |                                                                                                                     |
| 2,2S       | 10mer <sup>†*</sup>                 | CCUACUCGUU                                                         |                                                                                                                     |
| 2,2S       | 16mer <sup>†*</sup>                 | CCUACUCGUUACCUUC                                                   |                                                                                                                     |
| 2,2S       | 32mer <sup>†*</sup>                 | CCUACUCGUUACCCUCUUCUGAUACUGUUUAA                                   |                                                                                                                     |
| 2,2S       | 48mer <sup>†*</sup>                 | CCUACUCGUUACCUUCUUCUGACUCCUCUUU<br>CUUCCUACUGUUUAA                 |                                                                                                                     |
| 2,2S       | 64mer <sup>†*</sup>                 | CCUACUCGUUACCUUCUUCUGACUCCUCUUU<br>CUUCCUAUCUGAAUUGUGUUCUCCUGUUUAA |                                                                                                                     |
| 3          | 10,16,32,48<br>,64mers <sup>†</sup> | PolyA, polyC, polyG, polyU                                         | Used for Testing (Structures are generated using Nucleic Acid Builder (NAB) package of Amber)                       |
| 4          | 6mer <sup>†*</sup>                  | CGCGCG                                                             |                                                                                                                     |
| 4          | 10mer <sup>†*</sup>                 | CGCGCGCGCG                                                         |                                                                                                                     |

|   |                           |                                                                                                                                |                                                                                                 |
|---|---------------------------|--------------------------------------------------------------------------------------------------------------------------------|-------------------------------------------------------------------------------------------------|
| 4 | 10mer ♦*                  | CCUACUCGUU                                                                                                                     | Used for Testing.<br>(Structures are snapshots from all atom MD simulations)                    |
| 4 | 16mer ♦*                  | CCUACUCGUUACCUUC                                                                                                               |                                                                                                 |
| 4 | 18mer ♦*                  | CGCGCGCGCGCGCGCGCG                                                                                                             |                                                                                                 |
| 4 | 22mer ♦*                  | GCGCGCGCGCGCGCGCGCGCG                                                                                                          |                                                                                                 |
| 4 | 26mer ♦*                  | CGCGCGCGCGCGCGCGCGCGCGCGCG                                                                                                     |                                                                                                 |
| 4 | 30mer ♦*                  | CUGUUGCACUAUGCCAGACAAUAAUUUUUCU                                                                                                |                                                                                                 |
| 4 | 32mer ♦*                  | CCUACUCGUUACCCUCUUCUGAUACUGUUUAA                                                                                               |                                                                                                 |
| 4 | 48mer ♦*                  | CCUACUCGUUACCUUCUUCUGACUUCCUCUUU<br>CUUCCUACUGUUUAA                                                                            |                                                                                                 |
| 4 | 64mer ♦*                  | CCUACUCGUUACCUUCUUCUGACUUCCUCUUU<br>CUUCCUAUCUGAAUUGUGUUCUCCUGUUUAA                                                            |                                                                                                 |
| 4 |                           | <i>(All DNA sequences are the same as those of the RNA oligomers above with the Us replaced by Ts)</i>                         | Used for Testing.<br>(Structures are snapshots from                                             |
| 5 |                           | <i>(All sequences are the same as those of the ones in figure 2,2S. The CG structures are generated using the oxRNA model)</i> | Used for Testing.<br>(Structures are snapshots from all atom MD simulations)                    |
| 6 | 20mer hairpin (SL 20 RNA) | GGACUAGCGGAGGCUAGUCC                                                                                                           | Used for Testing.<br>(Structures are snapshots from all atom and coarse-grained MD simulations) |

|   |                           |                                     |                                                                                      |
|---|---------------------------|-------------------------------------|--------------------------------------------------------------------------------------|
| 6 | 34mer hairpin (SL 34 RNA) | GUCAGGGUCAGGAAAAAAAAAAACCUGACCCUGAC | Used for Testing. (Structures are snapshots from coarse-grained MD simulations only) |
| 6 | 16mer hairpin (SL 16 DNA) | TGCGATACTCATCGCA                    | Used for Testing. (Structures are snapshots from all atom and coarse-grained MD)     |
| 6 | 28mer hairpin (SL 28 DNA) | GCGTTCATCAGAGTCATCTGATGAACGC        | Used for Testing. (Structures are snapshots from all atom and coarse-grained MD)     |

**Table 2S. Hard-sphere radii for the five-bead representation of nucleotides.**

| Pseudo-atom | $R_{HS0}$ Å<br>(initial guess)<br>( $r_B=3.00\text{Å}$ , $f=0$ , $s=0$ ,<br>$s_T=0$ ) | $R_{HS1}$ Å<br>(optimized for single nucleosides)<br>( $r_B=2.88\text{Å}$ , $f=0$ , $s=0.05$ ,<br>$s_T=0.1$ ) | $R_{HS2}$ Å<br>(optimized for DNA/RNA oligos)<br>( $r_B=2.88\text{Å}$ ,<br>$f=0.125$ , $s=0.05$ ,<br>$s_T=0.1$ ) |
|-------------|---------------------------------------------------------------------------------------|---------------------------------------------------------------------------------------------------------------|------------------------------------------------------------------------------------------------------------------|
| P           | 3.8*                                                                                  | 3.8                                                                                                           | 3.32                                                                                                             |
| R           | 4.2*                                                                                  | 4.2                                                                                                           | 3.68                                                                                                             |
| dR          | 3.9*                                                                                  | 3.9                                                                                                           | 3.41                                                                                                             |
| $B_1^Y$     | 3.00                                                                                  | 3.02                                                                                                          | 3.17                                                                                                             |
| $B_1^R$     | 3.00                                                                                  | 2.74                                                                                                          | 2.60                                                                                                             |

|            |      |      |      |
|------------|------|------|------|
| $B_{23}^N$ | 3.00 | 2.88 | 3.12 |
| $B_{23}^T$ | 3.00 | 3.17 | 3.43 |

\*  $r_P = 3.8 \text{ \AA}$ ,  $r_R = 4.2 \text{ \AA}$ ,  $r_{dR} = 3.9 \text{ \AA}$  are  $R_{HS}$  values for the phosphate, sugar and deoxy-sugar group, respectively, which are independently obtained as described in the parameterization section of the main text.

**Table 3S. Comparison of the five-bead model ( $R_{HS1}$ ) with the all-atom model.** Nucleobases are indicated with the respective alphabets, and nucleotides with an R/D prefix to indicate RNA/DNA, respectively.

|    | CCS, EHSS ( $\text{\AA}^2$ ) |          |            | CCS, PA ( $\text{\AA}^2$ ) |          |            |
|----|------------------------------|----------|------------|----------------------------|----------|------------|
|    | Five-bead                    | All atom | % $\Delta$ | Five-bead                  | All atom | % $\Delta$ |
| A  | 59.55                        | 60.09    | -0.91      | 56.65                      | 58.97    | -3.94      |
| C  | 55.40                        | 55.59    | -0.34      | 52.78                      | 54.58    | -3.30      |
| G  | 66.09                        | 64.90    | 1.84       | 62.02                      | 63.50    | -2.34      |
| U  | 55.32                        | 54.66    | 1.21       | 52.74                      | 53.64    | -1.67      |
| T  | 61.68                        | 61.20    | 0.48       | 59.31                      | 59.67    | -0.36      |
| RA | 113.00                       | 114.52   | -1.34      | 106.72                     | 107.62   | -0.84      |
| RC | 107.56                       | 107.41   | 0.15       | 101.84                     | 101.15   | 0.69       |
| RG | 119.23                       | 118.80   | 0.36       | 111.93                     | 111.42   | 0.46       |
| RU | 107.78                       | 106.77   | 0.95       | 101.89                     | 100.44   | 1.43       |
| DT | 106.76                       | 106.16   | 0.60       | 101.14                     | 100.13   | 1.01       |

**Table 4S. Comparison of the five-bead model ( $R_{HS2}$ ) with the all-atom model.** Nucleobases are indicated with the respective alphabets, and nucleotides with an R/D prefix to indicate RNA/DNA, respectively.

|    | CCS, EHSS ( $\text{\AA}^2$ ) |          |            | CCS, PA ( $\text{\AA}^2$ ) |          |            |
|----|------------------------------|----------|------------|----------------------------|----------|------------|
|    | Five-bead                    | All atom | % $\Delta$ | Five-bead                  | All atom | % $\Delta$ |
| A  | 66.60                        | 60.09    | 10.83      | 63.88                      | 58.97    | 7.68       |
| C  | 61.98                        | 55.59    | 11.49      | 59.54                      | 54.58    | 8.33       |
| G  | 73.98                        | 64.90    | 14.00      | 69.85                      | 63.50    | 9.08       |
| U  | 61.85                        | 54.66    | 13.16      | 59.46                      | 53.64    | 9.79       |
| T  | 69.14                        | 61.20    | 13.00      | 66.98                      | 59.67    | 12.25      |
| RA | 104.35                       | 114.52   | -8.9       | 98.26                      | 107.62   | -9.53      |
| RC | 99.61                        | 107.41   | -7.3       | 93.62                      | 101.15   | -8.04      |
| RG | 111.46                       | 118.80   | -6.2       | 104.18                     | 111.42   | -6.95      |
| RU | 99.67                        | 106.77   | -6.7       | 93.62                      | 100.44   | -7.28      |
| DT | 101.98                       | 106.16   | -3.93      | 96.55                      | 100.13   | -3.58      |

## FIGURES

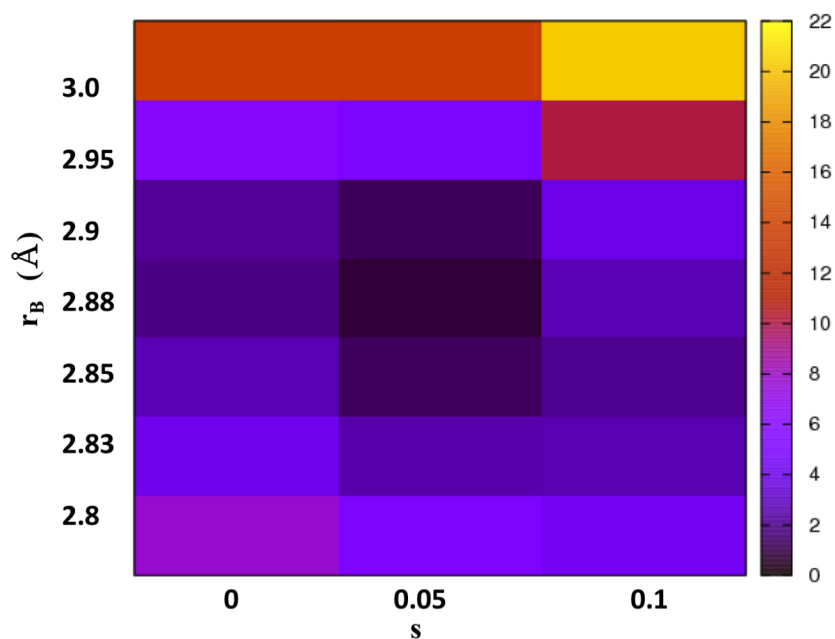

**Figure 1S.** The mean squared errors for the five-bead and all-atom CCS values averaged over the four nucleobases, plotted as a function of  $s$  and  $r_B$ . Starting with an initial value of 3.0 ( $r_B$ ) and 0.0 ( $s$ ), the parameter space ( $r_B \rightarrow (3.0, 2.95, 2.9, 2.88, 2.85, 2.83, 2.8 \text{ \AA})$ ,  $s \rightarrow (0.0, 0.05, 0.1)$ ) was explored. The values of  $r_B$  and  $s$  that minimized the mean square errors between the calculated and the reference all-atom CCS values were chosen for the  $R_{\text{HS1}}$  model.

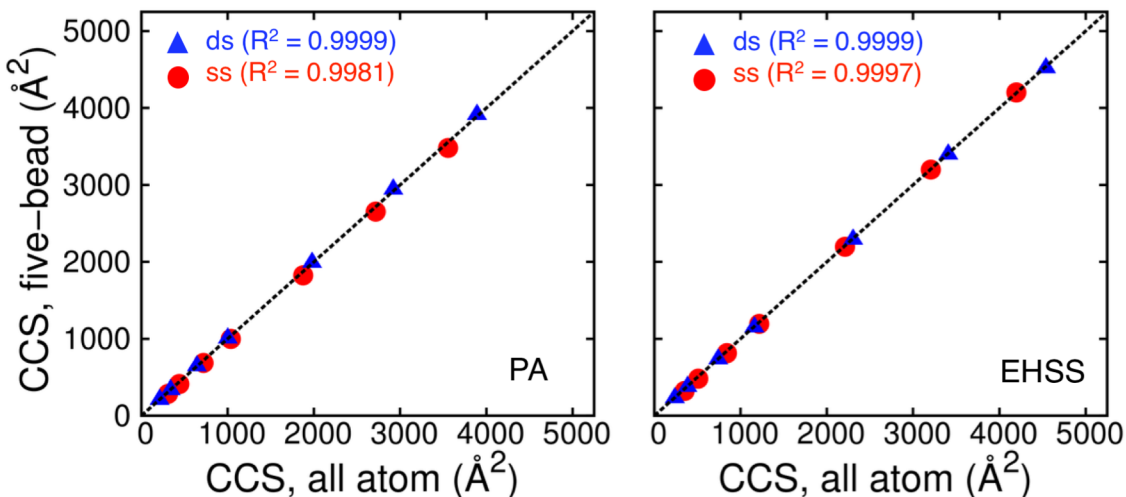

**Figure 2S.** Comparison of collision cross-section (CCS) values obtained from static all-atom and five-bead models by using the  $R_{HS2}$  parameter set. Single-stranded species are marked by blue triangles, while the double-stranded ones are red-circles. The CCS values were obtained by both the PA (left) and EHSS (right) algorithms.

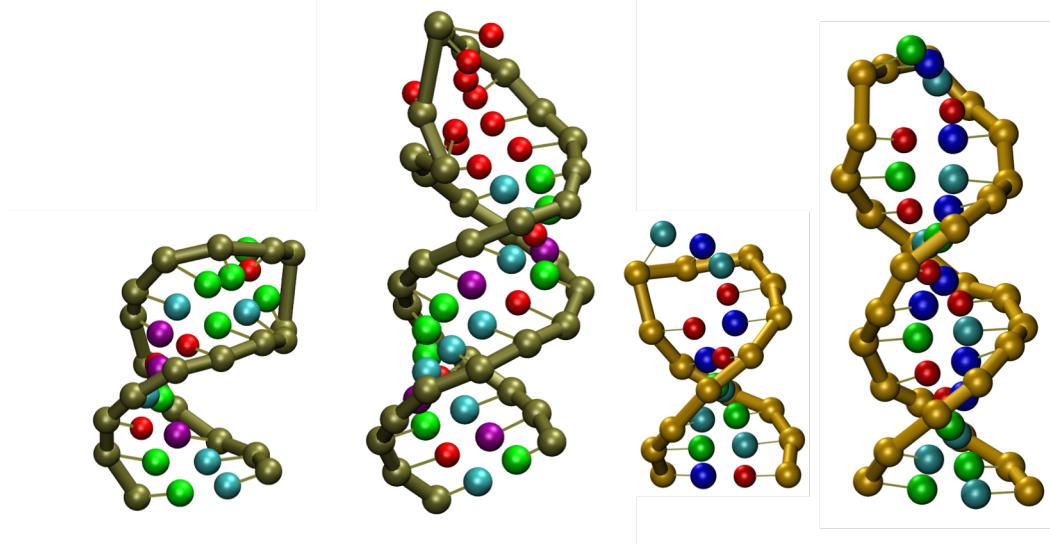

**Figure 3S.** The simulated hairpins (16mer & 28mer DNA hairpins and 20mer & 34mer RNA hairpins) in CG representation. The backbone is represented in dark (RNA) & light (DNA) tan and the different colored beads represent different nucleobases. (red – A, green – G, cyan – C, magenta – U, blue – T)
